# Supplementary material for: Photoisomerization of phytochrome's chromophore: a vibrational spectroscopic view on the primary ground state processes
Source: Royal Society of Chemistry journal article supplement (doi:10.1039/d5ra08731g), 2025-01-01
Supplement: d5ra08731g1.pdf [file d5ra08731g1.pdf]

## Supporting Information

### **Photoisomerization of phytochrome's chromophore: A vibrational spectroscopic view on the primary ground state processes.**

Galaan Merga,<sup>1</sup> Maximilian Große,<sup>1</sup> Patrick Piwowarski,<sup>1</sup> Anastasia Kraskov,<sup>2</sup> Francisco Velazquez Escobar,<sup>2</sup> Norbert Michael,<sup>2</sup> Manal Ebrahim,<sup>3</sup> Luisa Sauthof,<sup>3</sup> Patrick Scheerer,<sup>3</sup> Franz Bartl,<sup>1\*</sup> Peter Hildebrandt<sup>2\*</sup>

<sup>1</sup> Humboldt- Universität zu Berlin, Institut für Biologie, Biophysikalische Chemie, Invalidenstr 42, D-10115 Berlin, Germany

<sup>2</sup> Technische Universität Berlin, Institut für Chemie, Sekr. PC14, Straße des 17. Juni 135, D-10623 Berlin, Germany

<sup>3</sup> Institute of Medical Physics and Biophysics, Group Structural Biology of Cellular Signaling Charité – Universitätsmedizin Berlin, corporate member of Freie Universität Berlin and Humboldt-Universität zu Berlin, Charitéplatz 1, D-10117 Berlin, Germany

\* Correspondence addresses: [Peter.Hildebrandt@TU-Berlin.de](mailto:Peter.Hildebrandt@TU-Berlin.de); [Franz.Bartl@HU-Berlin.de](mailto:Franz.Bartl@HU-Berlin.de)

## Resonance Raman spectra of Agp2

RR spectra were measured of Agp2 in the Pfr, Lumi-F, and Pfr' states as highlighted in the photocycle in Figure S1. In the three states, H/D exchange of the ring D N-H is impaired such that a selected H/D substitution at rings A, B, C vs. ring D is possible.<sup>1,2</sup>

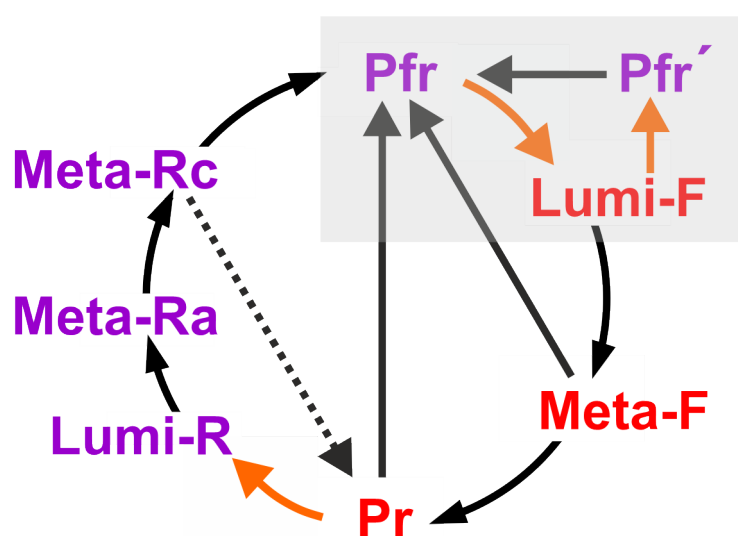

**Figure S1.** Photocycle of Agp2 and Agp1 with the states in ZZEssa configuration in violet and the states in ZZZssa configuration in red.<sup>3</sup> The orange and black arrows indicate photochemical and black reactions, respectively. The black dotted line represents a reaction that is very likely but not yet confirmed. The gray rectangle highlights those states of Agp2, the RR spectra of which are shown in Figures S2 – S4. The Pfr' state has been so far only detected for Agp2.

## 1. RR spectra of Pfr

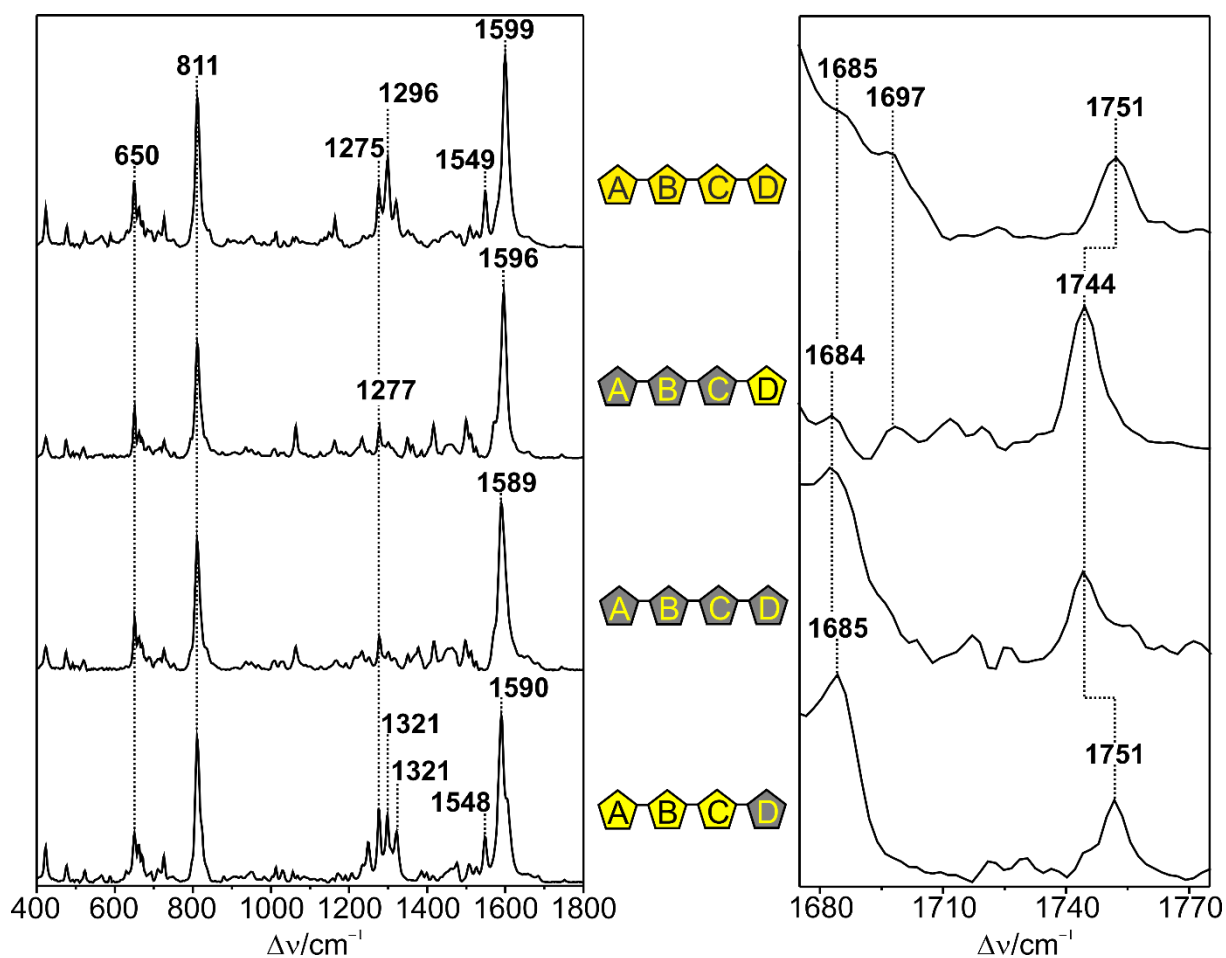

**Figure S2.** RR of Pfr with different H/D patterns at the pyrrole rings A, B, C vs. D, the ring C protonated propionic side chain. The frequencies in the C=O stretching region (right panel) agree very well with the IR data and thus confirm the assignments given in Table 1 of the manuscript.

## 2. RR spectra of Lumi-F

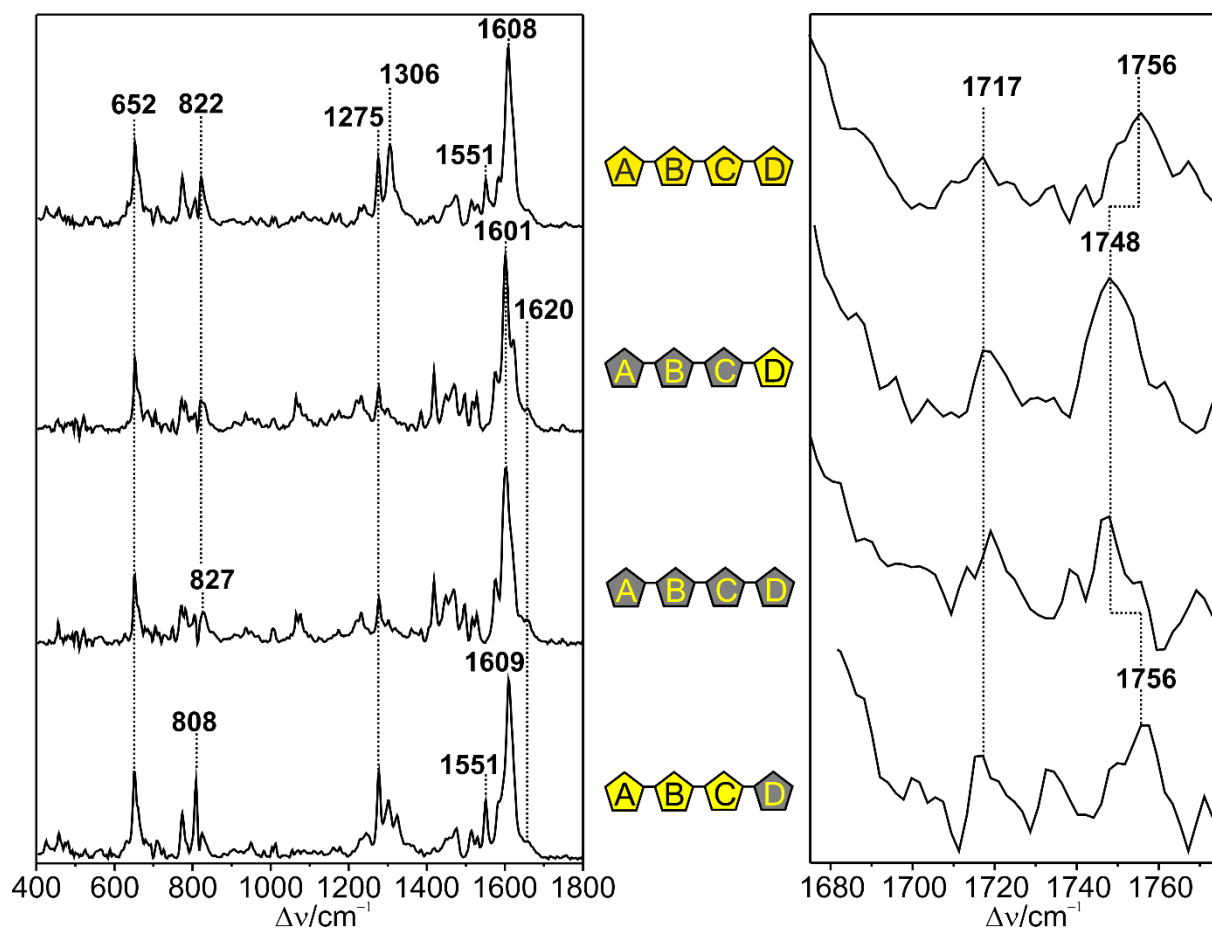

**Figure S3.** RR of Lumi-F with different H/D patterns at the pyrrole rings A, B, C vs. D, the ring C protonated propionic side chain. The frequencies in the C=O stretching region (right panel) agree very well with the IR data and thus confirm the assignments given in Table 1 of the main paper.

### 3. RR spectra of Pfr'

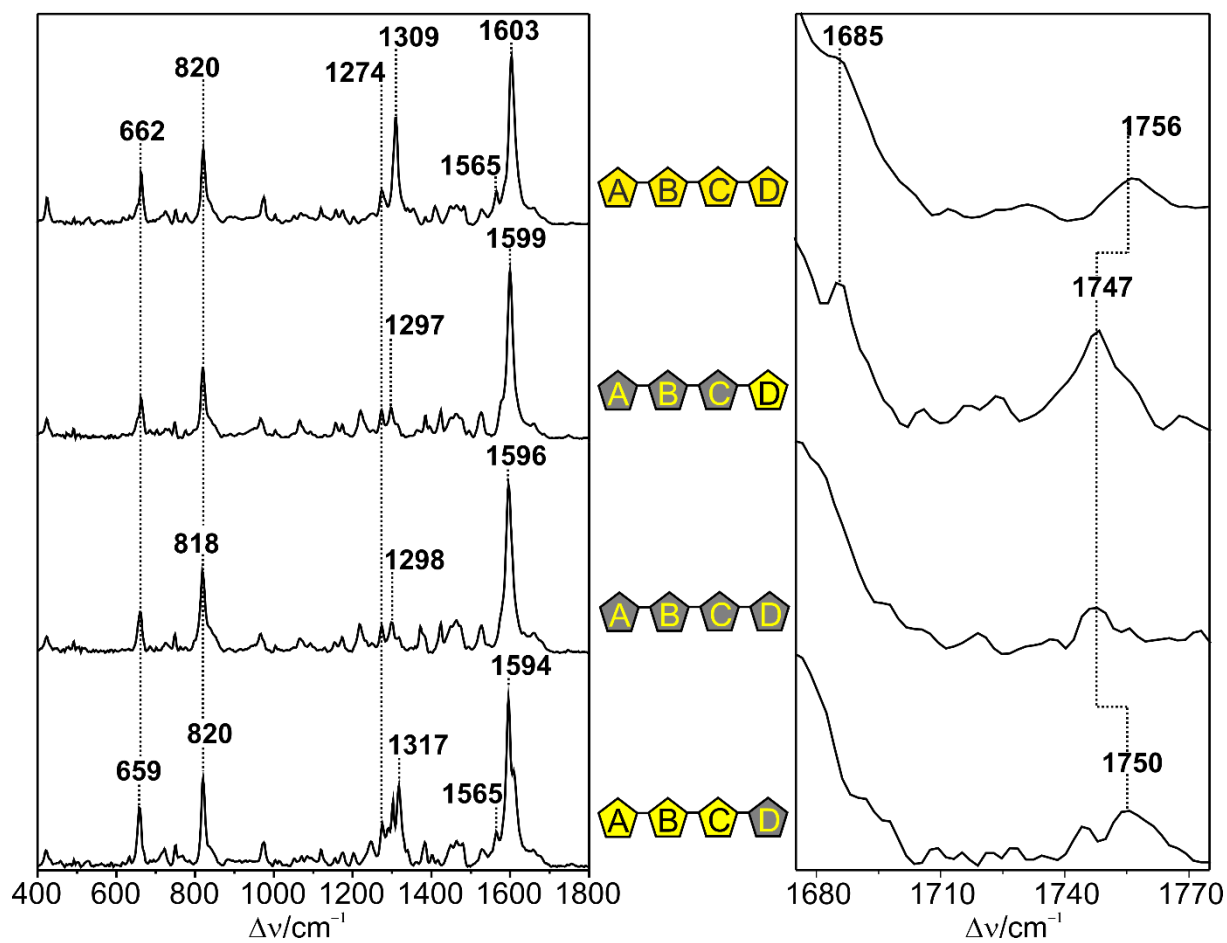

**Figure S4.** RR of Pfr' (see Figure S1) with different H/D patterns at the pyrrole rings A, B, C vs. D, the ring C protonated propionic side chain.

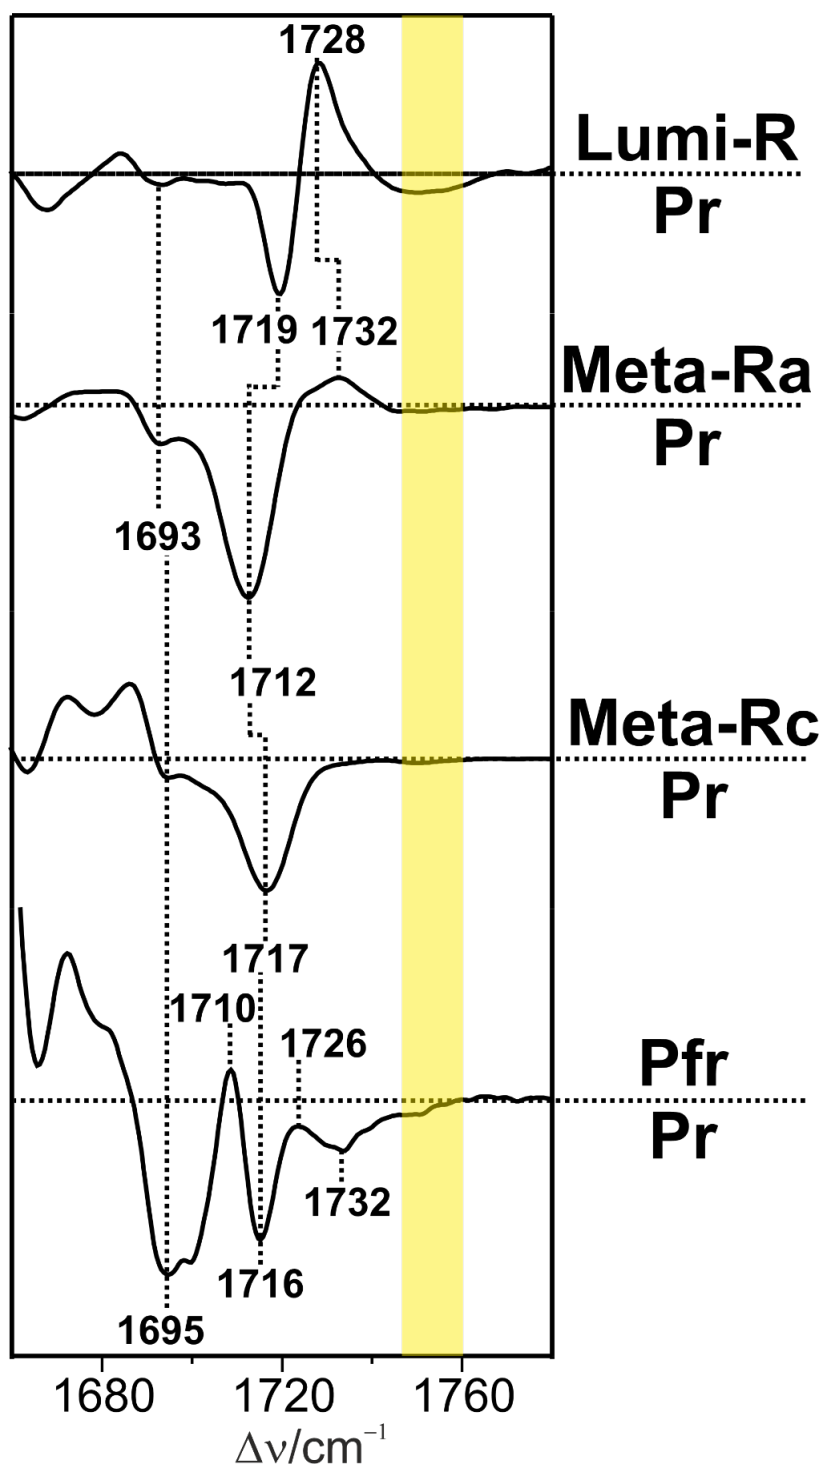

**Figure S5.** IR difference spectra of the Pr  $\rightarrow$  Pfr reaction pathway of Agp1 in H<sub>2</sub>O (see Figure S1) in the C=O stretching region. The yellow rectangle marks the region expected for a protonated propionic side chain, show no indication for a negative or positive signal. The horizontal dotted lines in the IR difference spectra mark the intensity difference of zero.

## References

- 1 F. Velázquez Escobar, D. Buhrke, N. Michael, L. Sauthof, S. Wilkening, N. N. Tavraz, J. Salewski, N. Frankenberg-Dinkel, M. A. Mroginski, P. Scheerer, T. Friedrich, F. Siebert and P. Hildebrandt, *Photochem. Photobiol.*, 2017, **93**, 724–732.
- 2 F. Velazquez Escobar, P. Piwowarski, J. Salewski, N. Michael, M. Fernandez Lopez, A. Rupp, M. B. Qureshi, P. Scheerer, F. Bartl, N. Frankenberg-Dinkel, F. Siebert, M. A. Mroginski and P. Hildebrandt, *Nat. Chem.*, 2015, **7**, 423–430.
- 3 P. Hildebrandt, *Biomolecules*, 2023, **13**, 1007.
